# Supplementary material
Source: Springer Nature journal article supplement (https://www.springermedizin.de/resource/supplementary/12876_2010_585_MOESM1_ESM.pdf/9437302)

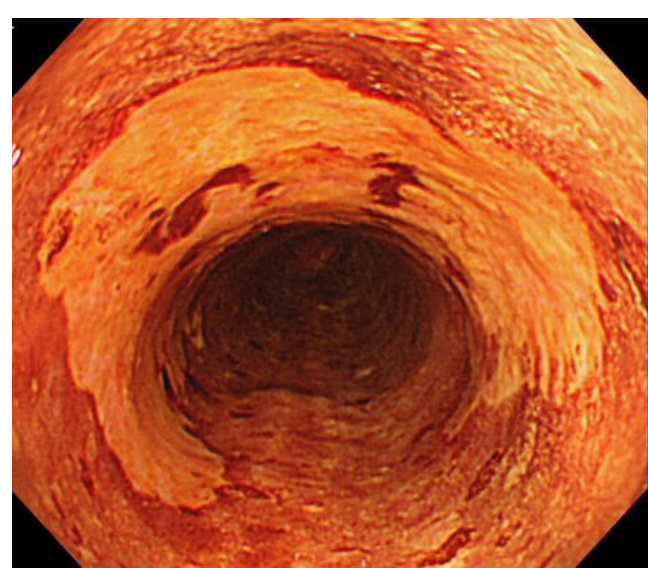

**A**

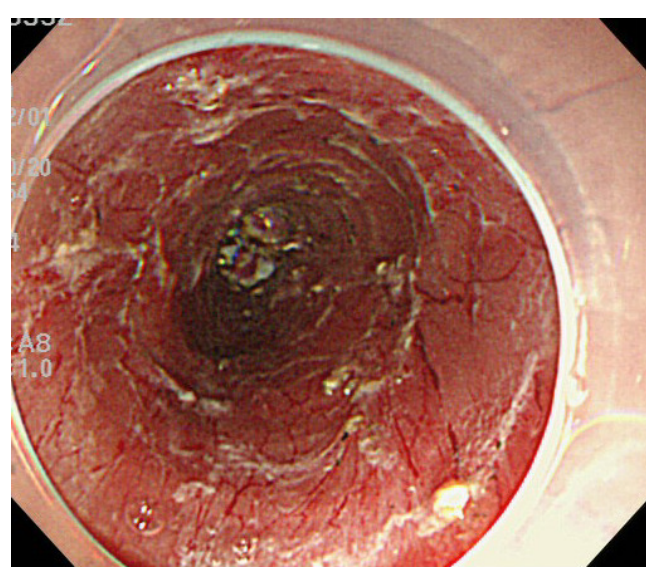

**B**

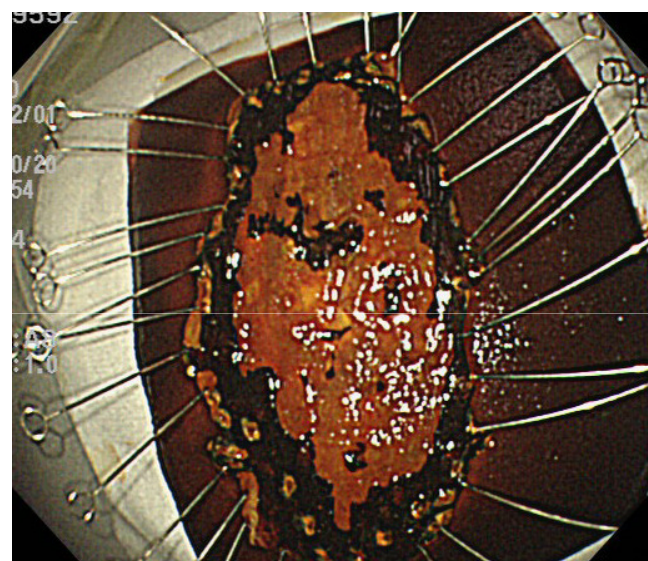

**C**

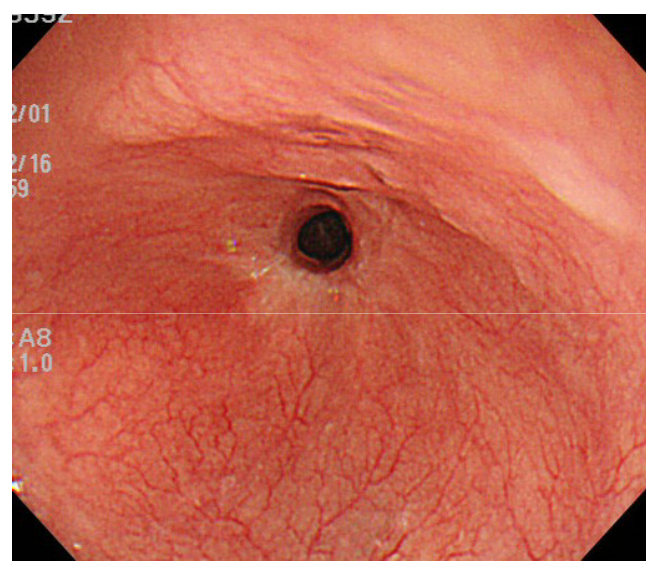

**D**

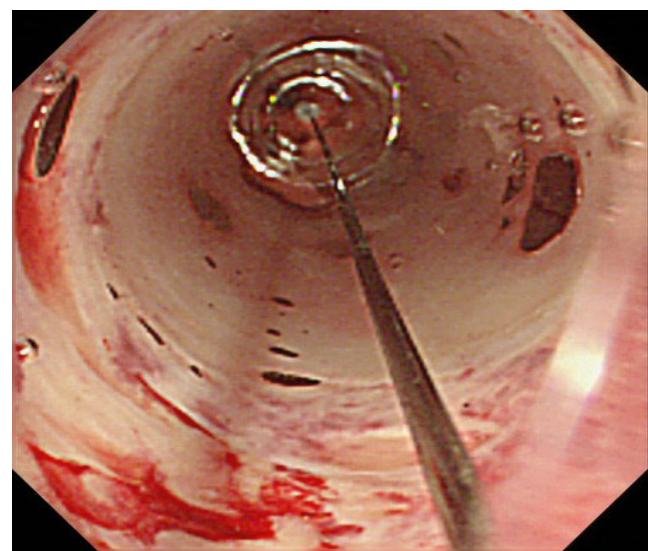

**E**

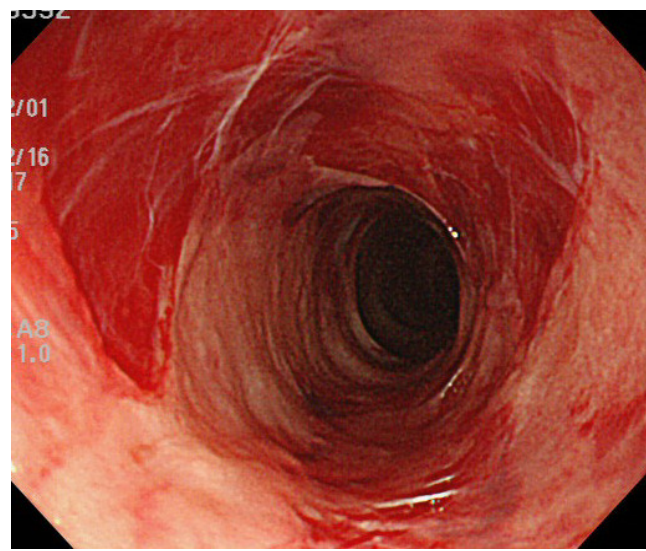

**F**

Supplement: MOESM1 [file 9437302]
